# Supplementary material for: Reversing the Natural Drug Resistance of Gram-Negative Bacteria to Fusidic Acid via Forming Drug–Phospholipid Complex
Source: MDPI journal article supplement (doi:10.3390/bioengineering11020177), 2024-02-11
Supplement: s1 [file s1=3fversion=3d1707655203]

# Reversing the Natural Drug Resistance of Gram-Negative Bacteria to Fusidic Acid via Forming Drug–Phospholipid Complex

Jianhong Liu <sup>†</sup>, Xuyang Lai <sup>†</sup>, Yuanhong Li, Zhuohang Yu, Xuan Wang, Chaoliang Zhang and Qiang Peng <sup>\*</sup>

State Key Laboratory of Oral Diseases & National Center for Stomatology & National Clinical Research Center for Oral Diseases, West China Hospital of Stomatology, Sichuan University, Chengdu 610041, China

<sup>\*</sup> Correspondence: qiangpengzz@scu.edu.cn or lijm2002@163.com

<sup>†</sup> These authors contributed equally to this work.

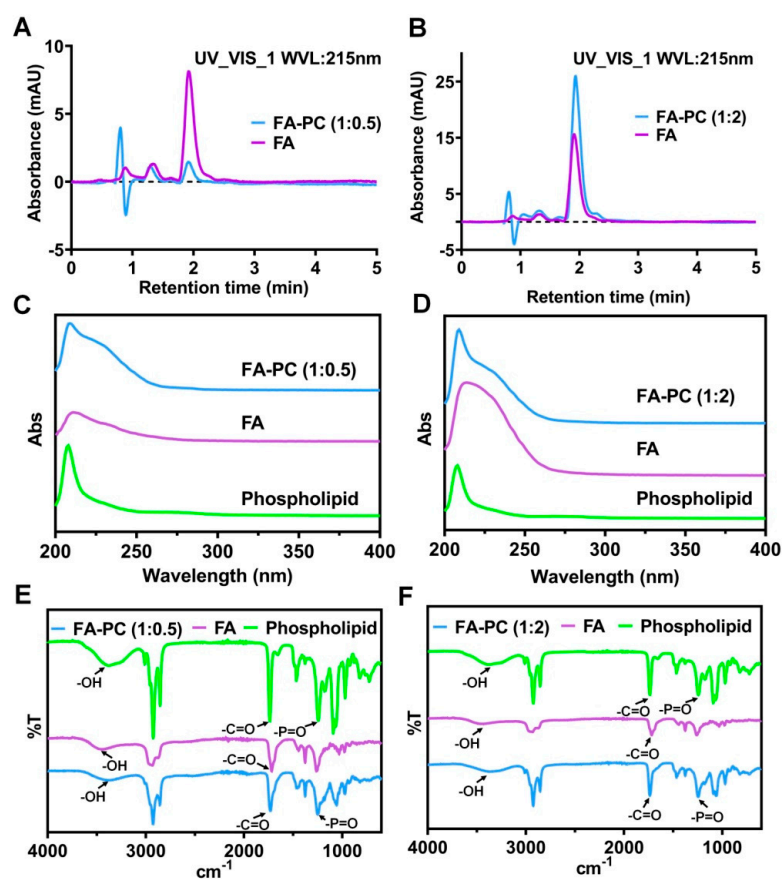

**Figure S1.** HPLC graphs of (A) FA-PC (1: 0.5) and (B) FA-PC (1: 2). The FTIR spectra of (C) FA-PC (1: 0.5) and (D) FA-PC (1: 2). UV spectra of (E) FA-PC (1: 0.5) and (F) FA-PC (1: 2).

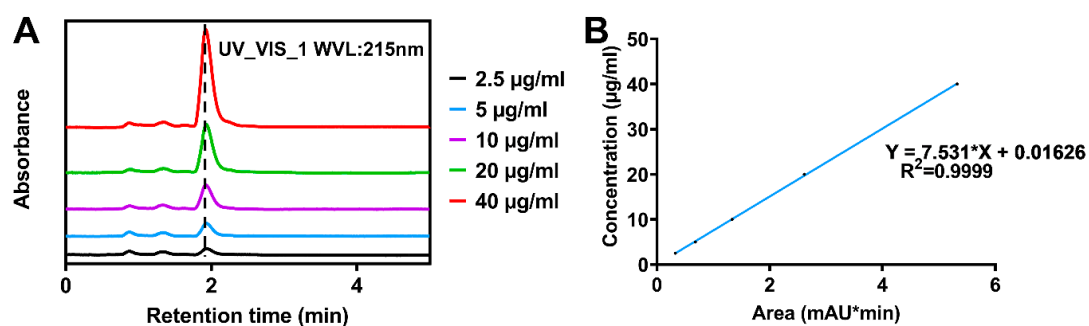

**Figure S2.** The HPLC graphs of FA standards (A) and the HPLC-based calibration and linear regression (B).

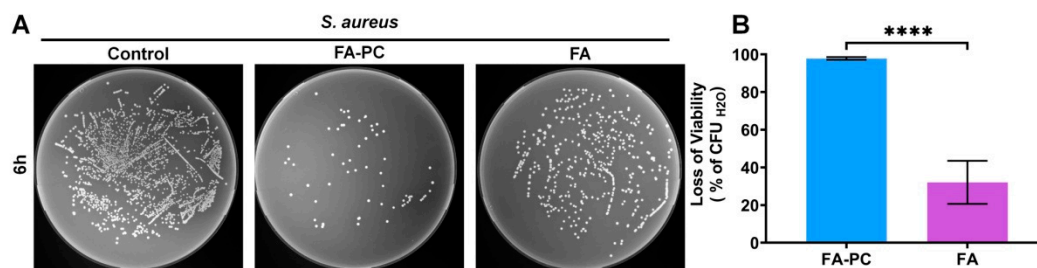

**Figure S3.** Antibacterial ability of FA-PC and FA (4 µg/mL) against *S. aureus*. (A) Typical photos of *S. aureus* on agar plates after treatment for 6 h. (B) The loss of viability of *S. aureus*. Data are presented as mean ± SD (n=3). Statistical significance: \*\*\*\*P < 0.0001.

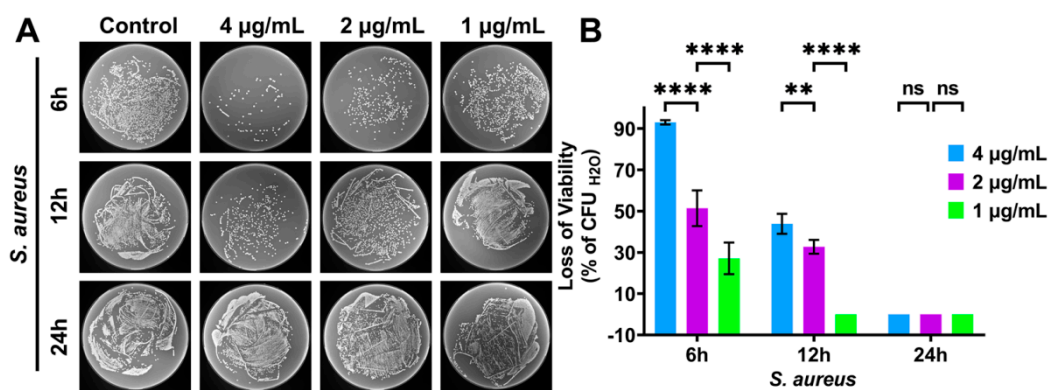

**Figure S4.** Concentration-dependent antibacterial ability of FA-PC (4, 2 and 1 µg/mL) against *S. aureus*. (A) Typical photos of *S. aureus* grown on agar plates. (B) The loss of viability of *S. aureus*. Data are presented as mean ± SD (n=3). Statistical significance: ns, non-significant; \*\*P < 0.01; \*\*\*\*P < 0.0001.
